# Supplementary material for: Objective Methods of 5-Aminolevulinic Acid-Based Endoscopic Photodynamic Diagnosis Using Artificial Intelligence for Identification of Gastric Tumors
Source: MDPI journal article supplement (doi:10.3390/jcm11113030), 2022-05-27
Supplement: s1 [file s1]

## Supplementary Materials

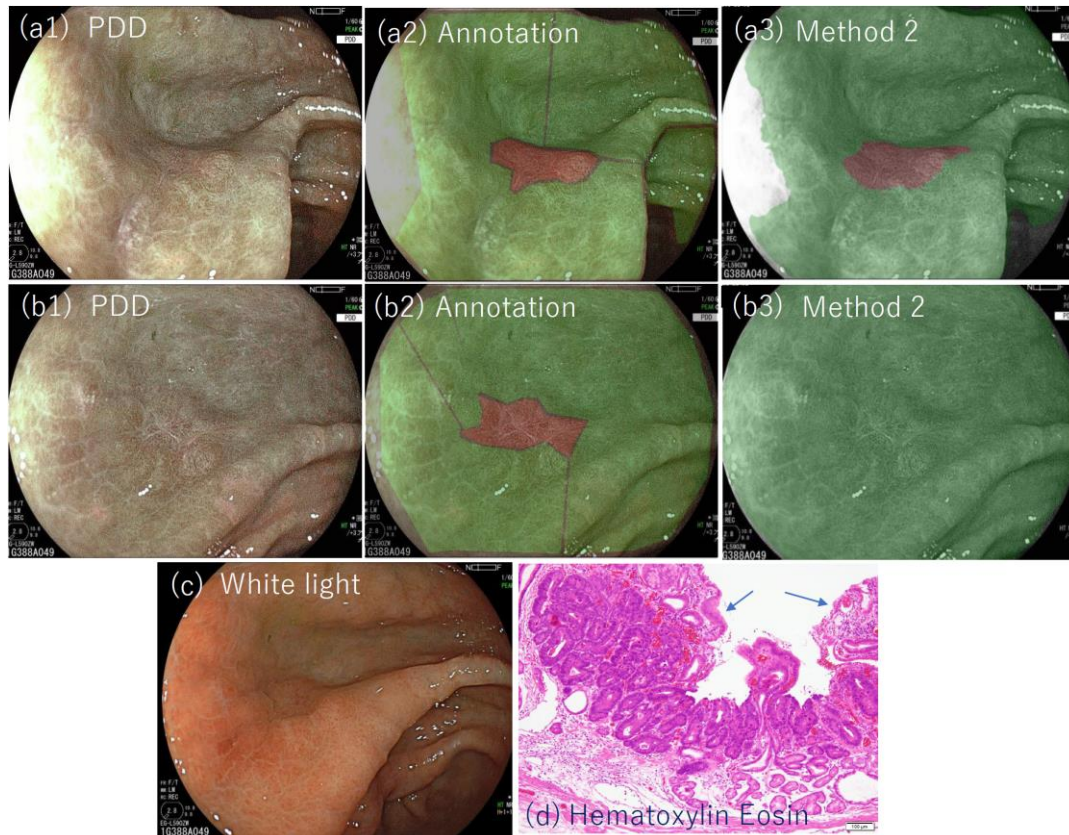

**Supplementary Figure S1.** Example case (lesion #4) with low area efficiency: (a1, b1) Photodynamic diagnosis images of lesion #4 (trained lesion); (a2) annotated image overlaid on (a1); (a3) the result of method two overlaid on (a1); (b2) annotated image overlaid on (b1); (b3) the result of method two overlaid on (b1); (c) white light image of lesion 4; (d) microscopic picture of hematoxylin and eosin staining of lesion #4. The blue arrow shows the surface non-tumor glands.

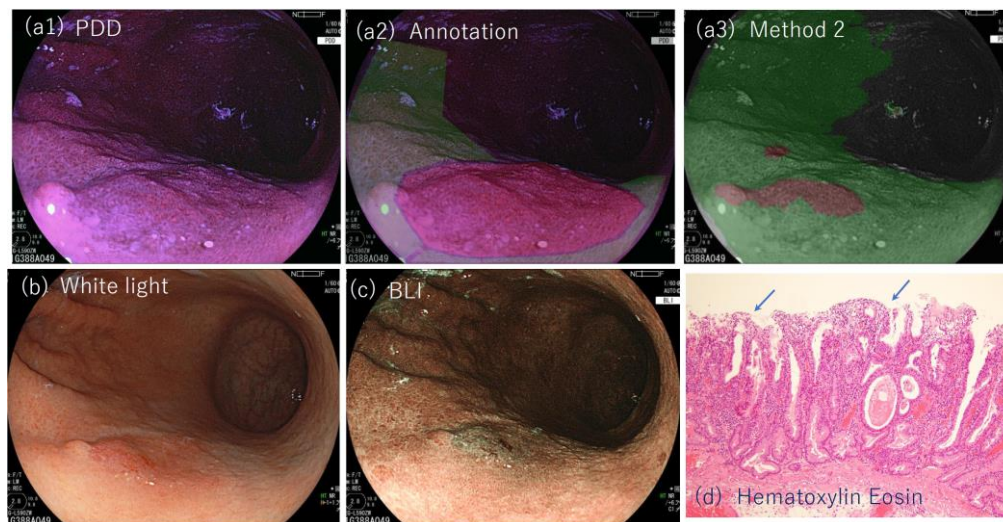

**Supplementary Figure S2.** Example case (lesion #18) with low area efficiency: (a1) Photodynamic diagnosis image of lesion #18 (validated lesion); (a2) annotated image overlaid on (a1), where tumor region is depicted in violet and non-tumor region is depicted in pink; (a3) the result of method two overlaid on (a1); (b) white light image of lesion #18; (d) microscopic picture of hematoxylin and eosin staining of lesion #18. The blue arrow shows the surface non-tumor glands.

**Supplementary Table S1.** Characteristics of the lesions included in this study. Morphology, size, histological diagnosis before resection (biopsy) and final histological diagnosis are shown. “Laser” or “LED” in the “Laser/LED” column shows that PDD is performed with laser-based system or LED-based system, respectively. Circle in the “Method one” column shows that method one was applied to the lesion. “Training” or “Validation” in “Method two Training/Validation” column shows that the lesion was used for training or validation in method two. Circle in the “Newly identified lesions” column shows that the lesion was first identified as tumor in PDD. Lesion #3, #21; Lesion #5, #25; Lesion #9, #22, #23; Lesion #10, #26; Lesion #16, #27; Lesion #20, #24 are from the same case, respectively. \* Part of the lesion #3 was used in the analysis due to oozing (the original size of the lesion #3 is 29×18mm).

\*\* One lesion of case #3, the original lesion planned to be resected by ESD, was excluded from the study because of oozing from the lesion.

| Lesion # | Case # | Morphology | Size     | Histological<br>Diagnosis<br>before resection | Final Histological Diagnosis<br>(ESD or surgical(#20,#24)<br>resection) | Laser/LED | Method one | Method two<br>Training/<br>Validation | Newly<br>identified<br>lesion |
|----------|--------|------------|----------|-----------------------------------------------|-------------------------------------------------------------------------|-----------|------------|---------------------------------------|-------------------------------|
| 1        | 1      | 0-IIa      | 19x13mm  | tub1                                          | tub1, M                                                                 | Laser     |            | Training                              |                               |
| 2        | 2      | 0-IIc      | 18x16mm  | tub2                                          | tub1>tub2, M                                                            | Laser     |            | Training                              |                               |
| 3        | 3 **   | 0-IIb      | 10x9mm * | tub1                                          | tub1, M                                                                 | Laser     |            | Training                              | ○                             |
| 4        | 4      | 0-IIc      | 7x7mm    | tub1                                          | tub1>tub2, M                                                            | Laser     |            | Training                              |                               |
| 5        | 5      | 0-IIc      | 30x25mm  | tub1, tub2                                    | tub1>tub2, M                                                            | Laser     |            | Training                              |                               |
| 6        | 6      | 0-IIa      | 12x10mm  | tub1                                          | tub1, M                                                                 | Laser     |            | Training                              |                               |
| 7        | 7      | 0-IIc      | 20x15mm  | Group4                                        | tub1>tub2, SM1                                                          | LED       | ○          | Training                              |                               |
| 8        | 8      | 0-IIa      | 38x30mm  | adenoma                                       | tub1, M                                                                 | LED       | ○          | Training                              |                               |
| 9        | 9      | 0-I        | 22x17mm  | tub1                                          | tub1> tub2>por, SM2                                                     | LED       | ○          | Training                              |                               |
| 10       | 10     | IIc        | 30x21mm  | tub1                                          | adenoma                                                                 | Laser     |            | Training                              |                               |
| 11       | 11     | IIa        | 10x10mm  | adenoma                                       | adenoma                                                                 | Laser     |            | Training                              |                               |
| 12       | 12     | IIa        | 38x30mm  | adenoma                                       | adenoma                                                                 | LED       | ○          | Training                              |                               |
| 13       | 13     | 0-IIc      | 17x12mm  | tub1                                          | tub1, M                                                                 | Laser     |            | Validation                            |                               |
| 14       | 14     | 0-IIa      | 15x12mm  | tub1                                          | tub1+2>por, M                                                           | Laser     |            | Validation                            |                               |
| 15       | 15     | 0-I        | 40x34mm  | tub1                                          | tub1, SM2                                                               | Laser     |            | Validation                            |                               |
| 16       | 16     | 0-IIa      | 15x11mm  | tub1 > tub2                                   | tub1, M                                                                 | Laser     |            | Validation                            |                               |
| 17       | 17     | 0-IIc      | 5x3mm    | tub1                                          | tub1, M                                                                 | Laser     |            | Validation                            | ○                             |
| 18       | 18     | 0-IIa      | 21x20mm  | tub1                                          | tub1, M                                                                 | Laser     |            | Validation                            |                               |
| 19       | 19     | 0-IIb      | 21x11mm  | tub1                                          | tub1, M                                                                 | LED       | ○          | Validation                            |                               |
| 20       | 20     | 0-IIa      | 10x6mm   | tub1                                          | tub1, M                                                                 | LED       | ○          | Validation                            |                               |
| 21       | 3 **   | 0-IIb      | 10x10mm  | tub1                                          | tub1, M                                                                 | Laser     |            | Validation                            | ○                             |
| 22       | 9      | 0-IIc      | 25x15mm  | tub1                                          | tub1>tub2, M                                                            | LED       | ○          | Validation                            |                               |
| 23       | 9      | 0-IIc      | 13x10mm  | tub1                                          | tub1, M                                                                 | LED       | ○          | Validation                            |                               |
| 24       | 20     | 0-IIa+IIc  | 12x10mm  | EBV-related                                   | EBV-related, SM2                                                        | LED       | ○          | Validation                            |                               |
| 25       | 5      | IIa        | 30x20mm  | adenoma                                       | adenoma                                                                 | Laser     |            | Validation                            |                               |
| 26       | 10     | IIa+IIb    | 30x25mm  | adenoma                                       | adenoma                                                                 | Laser     |            | Validation                            |                               |
| 27       | 16     | IIa        | 16x8mm   | adenoma                                       | adenoma                                                                 | Laser     |            | Validation                            |                               |
